# Supplementary material for: Phosphatidylcholine Specific PLC-Induced Dysregulation of Gap Junctions, a Robust Cellular Response to Environmental Toxicants, and Prevention by Resveratrol in a Rat Liver Cell Model
Source: PLoS One. 2015 May 29;10(5):e0124454. doi: 10.1371/journal.pone.0124454 (PMC4449167; doi:10.1371/journal.pone.0124454)
Supplement: S1 Dataset — (XLSX) [file pone.0124454.s001.xlsx]

## Sheet: GJIC-RAW_DATA
Table: Raw data for GJIC inhibition as evaluated by SLDT assay.
GJIC dysreg.	Abbreviation	Exposure	Chemicals				Comment
			GJIC dysreg.	D609+GJIC dysreg.	U0126+GJIC dysreg.	RES+GJIC dysreg.
				50 µM, 20 min	20 µM, 30 min	100 µM, 15 min
Perfluorooctanesulfonic acid	PFOSA	40 µM, 20 min	0.221679	0.218616	0.248541	0.239083
			0.231653	0.266869	0.278442	0.28708
			0.278871	0.276814	0.289963	0.299619
			0.280785	0.289989	0.337615	0.304838
			0.288605	0.322369		0.324378
			0.315601	0.347551		0.517107
			0.336691
		AVG	0.279127	0.287035	0.28864	0.328684
		SD	0.0383419	0.041052	0.0320635	0.0882176
		n	7	6	4	6
Benzoylperoxide	BzOOH	200 µM, 15 min	0.232782	0.320529	0.231548	0.192642
			0.306211	0.358043	0.234835	0.265031
			0.371956	0.359988	0.298652	0.274126
			0.415953	0.454269	0.316659	0.36301
			0.416313		0.569309	0.36381
			0.462689			0.420726
		AVG	0.367651	0.373207	0.330201	0.313224
		SD	0.077154	0.0493728	0.124241	0.0763603
		n	6	4	5	6
Arachidonic acid	AA	70-100 µM, 15 min	0.291633	0.228154	0.329493	0.27287	(90 uM)
			0.355662	0.333517			(90 uM)
			0.196438	0.164174	0.243635	0.192846	(70 uM)
			0.199602	0.200406	0.215755	0.207141	(75 uM)
			0.227507			0.213075	(90 uM)
			0.241004	0.307752	0.364179	0.263298	(90 uM)
			0.193239	0.195506	0.198763	0.188985	(100 uM)
		AVG	0.243584	0.238251	0.270365	0.223036
		SD	0.0558404	0.0615828	0.0649933	0.0329829
		n	7	6	5	6
1-Monolaurin	Lau	150 µM, 10 min	0.172799	0.192106	0.202224	0.201782
			0.199765	0.238961	0.220085	0.239342
			0.234975	0.250249	0.225627	0.256294
			0.235453	0.252872	0.231235	0.283691
			0.235453	0.263665	0.291568
			0.235453	0.271734
			0.243075
			0.246292
			0.254685
		AVG	0.228661	0.244931	0.234148	0.245277
		SD	0.0243348	0.0257775	0.0303153	0.0296818
		n	9	6	5	4
ß-Glycyrrhetinic acid	BGA	30-50 µM, 15 min	0.231814	0.229577	0.240544	0.198148	(50 uM)
			0.290903	0.24996	0.271375	0.280006	(50 uM)
			0.280498	0.243576	0.295718	0.268687	(50 uM)
			0.196986	0.176152			(50 uM)
			0.211994			0.224375	(50 uM)
			0.331274	0.267793	0.30644	0.318343	(30 uM)
			0.37415	0.216632	0.38121	0.286276	(30 uM)
		AVG	0.273946	0.230615	0.299057	0.262639
		SD	0.0599927	0.0291183	0.0469143	0.0400479
		n	7	6	5	6
Pentachlorophenol	PCP	50 µM, 10 min	0.19462	0.28748	0.305908	0.219362
			0.243021	0.301086	0.333655	0.322604
			0.246917	0.31754	0.348176	0.334688
			0.299023	0.435559	0.358124	0.395476
			0.328362			0.427083
			0.331959			0.621372
			0.333238
		AVG	0.282449	0.335416	0.336466	0.386764
		SD	0.0506309	0.0587892	0.0196719	0.123555
		n	7	4	4	6
Alachlor	Alachlor	185 µM, 25 min	0.15922	0.220911	0.16265	0.760965
			0.164596	0.155376	0.247363	0.599119
			0.193796	0.2142	0.29008	0.636945
			0.226553	0.267733	0.324137	0.696508
			0.226733	0.289246	0.326699	0.80445
			0.230591	0.314782	0.394716	0.910762
			0.231976	0.32279	0.419203	0.920113
			0.238826	0.36752	0.495258	0.981731
			0.264162	0.41279	0.546483
			0.280301
			0.289644
			0.363605
			0.370194
			0.38198
		AVG	0.258727	0.285039	0.356287	0.788824
		SD	0.0691824	0.0757876	0.11381	0.1313
		n	14	9	9	8
12-O-tetradecanoylphorbol-13-acetate	TPA	10 nM, 30 min	0.177644	0.202006	0.865033	0.906958
			0.180654	0.320729	0.99	1.10735
			0.199254	0.33	1.04523	1.14706
			0.199448	0.38358
			0.253772
		AVG	0.202154	0.309079	0.966756	1.05379
		SD	0.0273611	0.0663108	0.0753808	0.105084
		n	5	4	3	3
Epidermal Growth Factor	EGF	5 ug/L, 30 min	0.327189	0.34456	0.95443	0.957611
			0.31072	0.416647	1.22503	0.935652
			0.169579	0.33	0.604302	1.01922
			0.473027		0.617474
			0.134959		0.659756
			0.138807		0.743441
			0.159063		0.75
			0.172786		0.805725
			0.175205		0.820873
			0.178211		0.826912
			0.179454		0.842796
			0.185882		0.86
			0.187767		0.871843
			0.194254		0.88535
			0.195828		0.893958
			0.195879		0.907533
			0.196513		0.914767
			0.196513		0.921483
			0.198132		0.935806
			0.198606		0.938762
			0.200714		0.940082
			0.200805		0.945929
			0.207624		0.948197
			0.209454		0.948357
			0.209586		0.954199
			0.212951		0.960401
			0.214476		0.961663
			0.218978		0.964524
			0.221735		0.967023
			0.222887		0.968963
			0.22729		0.972753
			0.228132		0.977874
			0.229055		0.982011
			0.230472		0.982011
			0.230472		0.982267
			0.230867		0.982279
			0.231012		0.983809
			0.231459		0.984021
			0.237486		0.988126
			0.244248		0.988723
			0.250018		0.98958
			0.253098		0.99399
			0.262977		0.999317
			0.262977		0.999748
			0.263523		1.0001
			0.268363		1.00063
			0.269813		1.00417
			0.2707		1.00469
			0.271995		1.0134
			0.272768		1.0134
			0.278645		1.01408
			0.284096		1.02033
			0.284645		1.02403
			0.295101		1.02498
			0.299046		1.02969
			0.299838		1.03224
			0.30406		1.03476
			0.305726		1.03708
			0.307158		1.03749
			0.310152		1.03776
			0.312377		1.03981
			0.322059		1.04414
			0.323744		1.05069
			0.330475		1.05169
			0.332498		1.05333
			0.332832		1.05847
			0.333622		1.05903
			0.337056		1.05924
			0.349916		1.06173
			0.358683		1.07217
			0.360225		1.09432
			0.366203		1.09843
			0.377488		1.10634
			0.381102		1.10786
			0.401721		1.10786
			0.406		1.11028
			0.406388		1.11135
			0.420048		1.11567
			0.43247		1.17148
			0.436295		1.22411
					1.22503
		AVG	0.2693	0.363736	0.983925	0.970829
		SD	0.0760503	0.0378832	0.11543	0.0353752
		n	80	3	81	3
Lindane	Lindane	60 µM, 25 min	0.195922	0.282904	0.95757	0.67
			0.198613	0.313716	0.59093	0.728537
			0.28318	0.357099	0.566914	0.736827
			0.29222	0.386459	0.831484	0.785337
			0.32393		0.567401	0.786484
			0.330903		0.553285
			0.35124		0.8
		AVG	0.282287	0.335045	0.695369	0.741437
		SD	0.057832	0.0396968	0.15222	0.0430055
		n	7	4	7	5
Perfluorodecanoic acid	PFDA	50 µM, 20 min	0.187768	0.363397	0.186164	0.22
			0.22	0.42	0.26	0.204461
			0.25311	0.59681	0.27	0.25
		AVG	0.220293	0.460069	0.238721	0.22482
		SD	0.0266767	0.0994135	0.0373874	0.0189011
		n	3	3	3	3
Dicumylperoxide	DiCuOOH	50 µM, 15 min	0.29	0.843258	0.219289	0.766422
			0.405951	0.859218	0.311449	0.799782
			0.462727	0.95	0.44	0.92
		AVG	0.386226	0.884159	0.323579	0.828734
		SD	0.0718818	0.0470106	0.0905122	0.0659559
		n	3	3	3	3
2,2',4,4',5,5'-Hexachlorobiphenyl	PCB 153	50 µM, 30 min	0.225998	0.789226	0.196659
			0.290833	0.604792	0.274321	0.701049
			0.296138	0.948217	0.363419	0.886757
			0.31384			0.88854
			0.340848			0.951968
			0.390536
			0.478428
			0.49132
		AVG	0.353493	0.780745	0.278133	0.857078
		SD	0.0874503	0.140331	0.068133	0.0938349
		n	8	3	3	4
1,1,1-Trichloro-2-(2-chlorophenyl)-2-(4-chlorophenyl)ethane	DDT	30 µM, 20 min	0.24732	0.750831	0.283921	0.75
			0.280855	0.818186	0.288397	0.78272
			0.291791	0.926412	0.317613	0.79951
			0.337045		0.458208
			0.384114
		AVG	0.308225	0.83181	0.337035	0.77741
		SD	0.0475779	0.0723249	0.0711457	0.0205582
		n	5	3	4	3
Fluoren	Flu	100 µM, 10 min	0.302288	0.920495	0.29378	0.711844
			0.229243	0.712775	0.314769	0.893575
			0.232333	0.892252	0.317817	0.939358
			0.247235	1.0113
		AVG	0.252775	0.884205	0.308788	0.848259
		SD	0.0293849	0.108308	0.0106853	0.0982541
		n	4	4	3	3
1-Methylfluoren	1-MeFlu	70 µM, 10 min	0.154075	0.641854	0.283655	0.754211
			0.157225	0.699861	0.284445	1.06686
			0.252386	0.806395	0.309758	1.09329
			0.262021	0.902898	0.39467	1.09965
			0.304443	0.90578
			0.316508	0.930172
			0.317744	0.990107
			0.360411
		AVG	0.265602	0.839581	0.318132	1.0035
		SD	0.0708687	0.118909	0.0454194	0.144453
		n	8	7	4	4
Phenantrene	Phe	70 µM, 10 min	0.138542	0.639399	0.224735	0.663024
			0.156966	0.69751	0.278911	0.94083
			0.218073	0.776218	0.286653	0.987038
			0.259265		0.335011	1.10151
			0.303373		0.350467
			0.338401
		AVG	0.23577	0.704376	0.295156	0.923101
		SD	0.0726085	0.0560663	0.0445938	0.161147
		n	6	3	5	4
1-Methylanthracene	1-MeA	70 µM, 10 min	0.201261	0.618139	0.23	0.638959
			0.226263	0.65803	0.29	0.582066
			0.225138	0.687719	0.22	0.593111
			0.228014	0.703046	0.31	0.608844
			0.259255	0.715213	0.17	0.612019
			0.253795	0.732825	0.35	0.635647
			0.168574	0.742519		0.642876
			0.15866	0.746926		0.65
			0.158849	0.749737		0.654855
			0.161669	0.75		0.665024
			0.185456	0.751728		0.67107
			0.189516	0.752545		0.682508
			0.189886	0.753534		0.684197
			0.19	0.7573		0.695934
			0.190747	0.795447		0.708591
			0.191032	0.796323		0.73314
			0.194591	0.799548		0.733297
			0.195141	0.801601		0.734363
			0.2	0.803826		0.737101
			0.2	0.814463		0.738711
			0.200263	0.828634		0.741866
			0.201261	0.834737		0.745304
			0.208769	0.842205		0.75
			0.210097	0.84725		0.763276
			0.216537	0.850097		0.765352
			0.219697	0.856351		0.768253
			0.222278	0.856896		0.771191
			0.222563	0.860722		0.784161
			0.223533	0.861886		0.785318
			0.223626	0.8648		0.78567
			0.225138	0.864837		0.795291
			0.22572	0.871686		0.810826
			0.226263	0.873317		0.819582
			0.227528	0.873488		0.822738
			0.228014	0.876642		0.826106
			0.228294	0.876736		0.827859
			0.228543	0.880419		0.832538
			0.22909	0.880655		0.834385
			0.231495	0.882125		0.846088
			0.235217	0.884049		0.848009
			0.24097	0.889102		0.860864
			0.243343	0.8955		0.862966
			0.244307	0.895704		0.867007
			0.252409	0.897576		0.868771
			0.252409	0.898045		0.8709
			0.252805	0.898541		0.881754
			0.253439	0.89973		0.882647
			0.253795	0.905465		0.883842
			0.255968	0.906918		0.888979
			0.256461	0.910778		0.894512
			0.259189	0.92276		0.905953
			0.259255	0.924814		0.908745
			0.260666	0.924814		0.91084
			0.264716	0.928724		0.911771
			0.266146	0.929407		0.954836
			0.266498	0.931159		0.961209
			0.267097	0.931478		0.965263
			0.270027	0.937096		0.98152
			0.271556	0.940418		1.02749
			0.271617	0.940912		1.04959
			0.272502	0.945942		1.10242
			0.274206	0.945979		1.16142
			0.279871	0.947719		1.20237
			0.282614	0.953401		1.20924
			0.287099	0.95941
			0.29	0.960139
			0.290618	0.973027
			0.296512	0.979278
			0.297259	0.986052
			0.298083	1.00097
			0.30095	1.01604
			0.303454	1.02331
			0.305244	1.03515
			0.306489	1.05849
			0.307291	1.07934
			0.30965
			0.310302
			0.311368
			0.312008
			0.312123
			0.312247
			0.313947
			0.314486
			0.321954
			0.322705
			0.326052
			0.327532
			0.32932
			0.333036
			0.337652
			0.338127
			0.338741
			0.339897
			0.340864
			0.341398
			0.344034
			0.34788
			0.348957
			0.357158
			0.363021
			0.365776
			0.369181
			0.378432
			0.382325
			0.385088
			0.391753
			0.391949
			0.403211
			0.410806
			0.413698
			0.416597
			0.419333
			0.456386
		AVG	0.277837	0.871616	0.261667	0.817829
		SD	0.0660403	0.0932816	0.0606676	0.140934
		n	113	75	6	64
9,10-Dimethylanthracene	9,10-DiMeA	70-100 µM, 10 min	0.170591	0.860816		0.646531	(70 uM)
			0.255854	0.914992	0.342328	0.842404	(70 uM)
			0.275373		0.352019		(100 uM)
			0.319599	0.960485	0.262821	0.977007	(100 uM)
			0.357143	0.913294	0.454122	0.764612	(100 uM)
		AVG	0.275712	0.912397	0.352823	0.807638
		SD	0.0632486	0.0352865	0.0679569	0.120106
		n	5	4	4	4
Fluoranthene	Fla	70 µM, 10 min	0.144729	0.571807	0.454944	0.538883
			0.14849	0.606673	0.204374	0.986249
			0.225363	0.680283	0.243117	1.02116
			0.230046	0.802879	0.243995	1.06713
			0.246276	0.804815	0.249046	1.06934
			0.249149	0.841577	0.316614
			0.266392
			0.274045
			0.318713
			0.345542
		AVG	0.244875	0.718006	0.285348	0.936554
		SD	0.0606959	0.104244	0.0827734	0.201223
		n	10	6	6	5
Pyrene	Pyr	70 µM, 10 min	0.34002	0.808663	0.292388	0.887052
			0.257005	0.783832	0.330544	0.673255
			0.308043	0.939185	0.379897	0.685241
			0.337007		0.383818	0.827299
			0.356655		0.399599	0.842528
			0.391475		0.469084	0.897167
			0.415267
			0.473988
			0.498865
		AVG	0.375369	0.843893	0.375888	0.80209
		SD	0.0733654	0.0681397	0.0553098	0.0901675
		n	9	3	6	6
1-Methylpyrene	1-MePyr	70 µM, 10 min	0.282511	0.902215	0.282317	0.602232
			0.334667	0.970341	0.299908	0.807912
			0.355628	0.994008	0.453446	0.91107
			0.383911			0.938733
			0.414194
			0.428506
			0.486332
			0.490251
		AVG	0.397	0.955521	0.345224	0.814987
		SD	0.0678603	0.0389117	0.0768611	0.132155
		n	8	3	3	4
Perfluorooctanoic acid	PFOA	80 µM, 10 min	0.240345	0.512971	0.296826	0.606574
			0.288839	0.628737	0.491886	0.81
			0.16712	0.631933	0.530519	0.812654
			0.202104	0.868635
			0.228249
			0.312764
		AVG	0.239904	0.660569	0.439743	0.743076
		SD	0.0492707	0.129334	0.102281	0.0965277
		n	6	4	3	3
NAC+Benzoylperoxide	NAC+BzOOH	1 mM, 15 min + 200 µM, 15 min	0.434599	0.603711	0.63097	0.342367
			0.460047	0.695367	0.719928	0.440932
			0.48042	0.730671	0.732697	0.462859
			0.529697	0.778045	0.785313	0.510617
		AVG	0.476191	0.701949	0.717227	0.439194
		SD	0.0348974	0.0638545	0.0555035	0.0613186
		n	4	4	4	4
R59022	R59022	30-50 µM, 10 min	0.202894	0.782857	0.475116	0.64239
			0.21235	0.822412	0.680932	0.907654
			0.386393	0.939116	0.703044	0.917211
			0.401234		0.706093	1.00134
			0.515489
		AVG	0.343672	0.848128	0.641296	0.867148
		SD	0.119769	0.0663338	0.0964342	0.134787
		n	5	3	4	4
Thrombin receptor activator peptide-6	TRAP-6	50 µM, 30 min	0.287795	0.447266	1.00886	0.923654
			0.363148	0.567034	1.06489	0.975765
			0.387357	0.602882	1.07528	1.00256
			0.390017	0.648892
			0.399769	0.675424
			0.401357
			0.41886
			0.466263
			0.489004
		AVG	0.400397	0.588299	1.04967	0.967326
		SD	0.0546464	0.0797716	0.0291728	0.0327607
		n	9	5	3	3
		n	6	3	5	4
		n	4	4	3	3
		n	8	7	4	4
		n	9	3	6	6
		n	9	6	5	4
		n	8	3	3	4
		n	8	3	3	4
		n	5	3	4	3
		n	14	9	9	8
		n	7	4	4	6
		n	7	4	7	5
		n	6	4	3	3
		n	3	3	3	3
		n	7	6	5	6
		n	5	4	3	3
		n	7	6	5	6
		n	9	5	3	3
		n	6	4	5	6
		n	4	4	4	4
		n	3	3	3	3
		n	5	3	4	4
		n	5	4	4	4
		n	10	6	6	5
#REF!	#REF!	AVG	0.23577	0.704376	0.295156	0.923101
#REF!	#REF!	AVG	0.252775	0.884205	0.308788	0.848259
#REF!	#REF!	AVG	0.265602	0.839581	0.318132	1.0035
#REF!	#REF!	AVG	0.375369	0.843893	0.375888	0.80209
#REF!	#REF!	AVG	0.228661	0.244931	0.234148	0.245277
#REF!	#REF!	AVG	0.397	0.955521	0.345224	0.814987
#REF!	#REF!	AVG	0.353493	0.780745	0.278133	0.857078
#REF!	#REF!	AVG	0.308225	0.83181	0.337035	0.77741
#REF!	#REF!	AVG	0.258727	0.285039	0.356287	0.788824
#REF!	#REF!	AVG	0.282449	0.335416	0.336466	0.386764
#REF!	#REF!	AVG	0.282287	0.335045	0.695369	0.741437
#REF!	#REF!	AVG	0.239904	0.660569	0.439743	0.743076
#REF!	#REF!	AVG	0.220293	0.460069	0.238721	0.22482
		AVG	0.273946	0.230615	0.299057	0.262639
#REF!	#REF!	AVG	0.202154	0.309079	0.966756	1.05379
#REF!	#REF!	AVG	0.243584	0.238251	0.270365	0.223036
#REF!	#REF!	AVG	0.400397	0.588299	1.04967	0.967326
#REF!	#REF!	AVG	0.367651	0.373207	0.330201	0.313224
#REF!	#REF!	AVG	0.476191	0.701949	0.717227	0.439194
#REF!	#REF!	AVG	0.386226	0.884159	0.323579	0.828734
#REF!	#REF!	AVG	0.343672	0.848128	0.641296	0.867148
#REF!	#REF!	AVG	0.275712	0.912397	0.352823	0.807638
#REF!	#REF!	AVG	0.244875	0.718006	0.285348	0.936554
		SD	0.0726085	0.0560663	0.0445938	0.161147
		SD	0.0293849	0.108308	0.0106853	0.0982541
		SD	0.0708687	0.118909	0.0454194	0.144453
		SD	0.0733654	0.0681397	0.0553098	0.0901675
		SD	0.0243348	0.0257775	0.0303153	0.0296818
		SD	0.0678603	0.0389117	0.0768611	0.132155
		SD	0.0874503	0.140331	0.068133	0.0938349
		SD	0.0475779	0.0723249	0.0711457	0.0205582
		SD	0.0691824	0.0757876	0.11381	0.1313
		SD	0.0506309	0.0587892	0.0196719	0.123555
		SD	0.057832	0.0396968	0.15222	0.0430055
		SD	0.0492707	0.129334	0.102281	0.0965277
		SD	0.0266767	0.0994135	0.0373874	0.0189011
		SD	0.0599927	0.0291183	0.0469143	0.0400479
		SD	0.0273611	0.0663108	0.0753808	0.105084
		SD	0.0558404	0.0615828	0.0649933	0.0329829
		SD	0.0546464	0.0797716	0.0291728	0.0327607
		SD	0.077154	0.0493728	0.124241	0.0763603
		SD	0.0348974	0.0638545	0.0555035	0.0613186
		SD	0.0718818	0.0470106	0.0905122	0.0659559
		SD	0.119769	0.0663338	0.0964342	0.134787
		SD	0.0632486	0.0352865	0.0679569	0.120106
		SD	0.0606959	0.104244	0.0827734	0.201223

## Sheet: PCA_data & ANOVAs
Table: Summary of GJIC inhibition data used for PCA analysis, results of PCA analysis, normality and equal variance tests, ANOVA and Dunnet's post hoc comparisons, Kruskal-Wallis ANOVA and Dunn's post hoc test (conducted for data withou normal distribution or equal varinances)
				Variable 1			Variable 2			Variable 3			Variable 4			PCA (Variable 1, 2, 3, 4)
				GJIC dysregulator alone			D609+GJIC dysregulator			U0126+GJIC dysregulator			RES+GJIC dysregulator							Normality test (Shapiro-Wilk)	Equal Variance Test	ANOVA		Dunnet`s post-hoc comparisons with GJIC dysregulator alone treatment									Kruskal-Wallis ANOVA		Dunn`s post-hoc comparisons with GJIC dysregulator alone treatment
				FOC			FOC			FOC			FOC											D609+GJIC dysregulator			U0126+GJIC dysregulator			RES+GJIC dysregulator					D609+GJIC dysregulator			U0126+GJIC dysregulator			RES+GJIC dysregulator
	Chemical	Abbreviation	Exposure	mean	SD	n	mean	SD	n	mean	SD	n	mean	SD	n	Factor1	Factor2	Factor3	Factor4			F	P	Diff. of Means	q´	P<0.05	Diff. of Means	q´	P<0.05	Diff. of Means	q´	P<0.05	H	P	Diff. Of Ranks	Q	P<0.05	Diff. Of Ranks	Q	P<0.05	Diff. Of Ranks	Q	P<0.05	Abbreviation
1	Epidermal Growth Factor	EGF	5 ug/L, 30 min	0.2693	0.0760503	80	0.363736	0.0378832	3	0.983925	0.11543	81	0.970829	0.0353752	3	0.63013	2.55108	0.323888	0.0537037	<0.050	0.358	740.186	<0.001										125.717	<0.001	29.396	1.034	No	84.951	11.146	Yes	74.063	2.605	Yes	EGF
2	Thrombin receptor activator peptide-6	TRAP-6	50 uM, 30 min	0.400397	0.0546464	9	0.588299	0.0797716	5	1.04967	0.0291728	3	0.967326	0.0327607	3	2.02287	2.01839	-1.18185	0.027872	0.255	0.54	111.926	<0.001	0.188	5.307	Yes	0.649	15.343	Yes	0.567	13.397	Yes												TRAP-6
3	R59022	R59022	30-50 uM, 10 min	0.343672	0.119769	5	0.848128	0.0663338	3	0.641296	0.0964342	4	0.867148	0.134787	4	1.50756	0.193774	-0.233716	0.36128	0.165	0.844	15.918	<0.001	0.504	5.422	Yes	0.298	3.482	Yes	0.523	6.125	Yes												R59022
4	Arachidonic acid	AA	70-100 uM, 15 min	0.243584	0.0558404	7	0.238251	0.0615828	6	0.270365	0.0649933	5	0.223036	0.0329829	6	-2.38698	-0.0297091	-0.301241	0.112795	<0.050	0.403												1.932	0.587										AA
5	1-monolaurin	Lau	150 uM, 10 min	0.228661	0.0243348	9	0.244931	0.0257775	6	0.234148	0.0303153	5	0.245277	0.0296818	4	-2.46202	-0.114866	-0.0494478	0.0916818	0.382	0.953	0.503	0.685																					Lau
6	12-O-tetradecanoylphorbol-13-acetate	TPA	10 nM, 30 min	0.202154	0.0273611	5	0.309079	0.0663108	4	0.966756	0.0753808	3	1.05379	0.105084	3	0.253263	2.81303	1.26848	0.0690419	0.21	0.287	108.677	<0.001	0.107	1.977	No	0.765	12.986	Yes	0.852	14.464	Yes												TPA
7	ß-Glycyrrhetinic acid	BGA	30-50 uM, 15 min	0.273946	0.0599927	7	0.230615	0.0291183	6	0.299057	0.0469143	5	0.262639	0.0400479	6	-2.09246	0.0394155	-0.618871	-0.0870263	0.569	0.174	1.765	0.186																					BGA
8	Perfluorooctanoic acid	PFOA	80 uM, 10 min	0.239904	0.0492707	6	0.660569	0.129334	4	0.439743	0.102281	3	0.762798	0.0686397	3	-0.0908699	0.0496544	0.827217	0.343317	0.678	0.65	22.712	<0.001	0.421	6.335	Yes	0.2	2.747	Yes	0.523	7.188	Yes												PFOA
9	Perfluorodecanoic acid	PFDA	50 uM, 20 min	0.220293	0.0266767	3	0.460069	0.0994135	3	0.238721	0.0373874	3	0.22482	0.0189011	3	-2.06731	-0.527253	0.133041	0.675044	0.429	0.329	8.766	0.007	0.24	4.315	Yes	0.0184	0.332	No	0.00453	0.0815	Do Not Test												PFDA
10	Perfluorooctanesulfonic acid	PFOSA	40 uM, 20 min	0.279127	0.0383419	7	0.287035	0.041052	6	0.28864	0.0320635	4	0.328684	0.0882176	6	-1.80127	-0.0754758	-0.518339	-0.138906	<0.050	0.806												1.367	0.713										PFOSA
11	Fluoren	Flu	100 uM, 10 min	0.252775	0.0293849	4	0.884205	0.108308	4	0.308788	0.0106853	3	0.848259	0.0982541	3	0.554462	-0.794467	1.09301	0.331654	0.168	0.311	51.635	<0.001	0.631	10.004	Yes	0.056	0.822	No	0.595	8.734	Yes												Flu
12	1-Methylfluoren	1-MeFlu	70 uM, 10 min	0.265602	0.0708687	8	0.839581	0.118909	7	0.318132	0.0454194	4	1.0035	0.144453	4	0.886999	-0.596651	1.19497	-0.135457	<0.050	0.519												17.396	<0.001	10.839	3.088	Yes	1.875	0.451	No	14.375	3.461	Yes	1-MeFlu
13	Phenantrene	Phe	70 uM, 10 min	0.23577	0.0726085	6	0.704376	0.0560663	3	0.295156	0.0445938	5	0.923101	0.161147	4	0.191012	-0.38849	1.34428	-0.170129	0.29	0.498	44.14	<0.001	0.469	6.301	Yes	0.0594	0.932	No	0.687	10.124	Yes												Phe
14	1-Methylanthracene	1-MeA	70 uM, 10 min	0.277837	0.0660403	113	0.871616	0.0932816	75	0.261667	0.0606676	6	0.817829	0.140934	64	0.55225	-1.00413	0.762202	0.151011	<0.050	(P < 0.050												194.763	<0.001	138.982	12.505	Yes	6.845	0.219	No	116.553	9.984	Yes	1-MeA
15	9,10-Dimethylanthracene	9,10-DiMeA	70-100 uM, 10 min	0.275712	0.0632486	5	0.912397	0.0352865	4	0.352823	0.0679569	4	0.807638	0.120106	4	0.727274	-0.784139	0.724635	0.44353	0.981	0.248	56.396	<0.001	0.637	10.76	Yes	0.0771	1.303	No	0.532	8.989	Yes												9,10-DiMeA
16	Fluoranthene	Fla	70 uM, 10 min	0.244875	0.0606959	10	0.718006	0.104244	6	0.285348	0.0827734	6	0.936554	0.201223	5	0.294776	-0.460133	1.27472	-0.23088	<0.050	0.274												19.367	<0.001	12.3	3.001	Yes	0.8	0.195	No	15.6	3.588	Yes	Fla
17	Pyrene	Pyr	70 uM, 10 min	0.375369	0.0733654	9	0.843893	0.0681397	3	0.375888	0.0553098	6	0.80209	0.0901675	6	1.2049	-0.799738	-0.542353	-0.165273	0.336	0.715	56.353	<0.001	0.469	8.734	Yes	0.000519	0.0122	No	0.427	10.062	Yes												Pyr
18	1-Methylpyrene	1-MePyr	70 uM, 10 min	0.397	0.0678603	8	0.955521	0.0389117	3	0.345224	0.0768611	3	0.814987	0.132155	4	1.57866	-1.16692	-0.692266	-0.103482	0.391	0.554	38.958	<0.001	0.559	8.596	Yes	0.0518	0.797	No	0.418	7.112	Yes												1-MePyr
19	Pentachlorophenol	PCP	50 uM, 10 min	0.282449	0.0506309	7	0.335416	0.0587892	4	0.336466	0.0196719	4	0.386764	0.123555	6	-1.48148	0.0189102	-0.457995	-0.0761137	0.083	0.238	1.601	0.226																					PCP
20	Lindane	Lindane	60 uM, 25 min	0.282287	0.057832	7	0.335045	0.0396968	4	0.695369	0.15222	7	0.741437	0.0430055	5	-0.235182	1.45979	-0.0620924	-0.140209	0.257	0.128	31.252	<0.001	0.0528	0.818	No	0.413	7.511	Yes	0.459	7.621	Yes												Lindane
21	1,1,1-Trichloro-2-(2-chlorophenyl)-2-(4-chlorophenyl)ethane	DDT	30 uM, 20 min	0.308225	0.0475779	5	0.83181	0.0723249	3	0.337035	0.0711457	4	0.77741	0.0205582	3	0.65877	-0.769295	0.242328	0.127267	0.244	0.644	64.087	<0.001	0.524	10.794	Yes	0.0288	0.647	No	0.469	9.673	Yes												DDT
22	2,2',4,4',5,5'-Hexachlorobiphenyl	PCB 153	50 uM, 30 min	0.353493	0.0874503	8	0.780745	0.140331	3	0.278133	0.068133	3	0.857078	0.0938349	4	0.921534	-0.911596	-0.140225	-0.490572	0.896	0.264	29.075	<0.001	0.427	5.737	Yes	0.0754	1.012	No	0.504	7.476	Yes												PCB 153
23	Alachlor	Alachlor	185 uM, 25 min	0.258727	0.0691824	14	0.285039	0.0757876	9	0.356287	0.11381	9	0.788824	0.1313	8	-0.829902	0.51495	0.532509	-0.855918	0.555	0.082	52.183	<0.001	0.0263	0.605	Do Not Test	0.0976	2.243	No	0.53	11.747	Yes												Alachlor
24	Benzoylperoxide	BzOOH	200 uM, 15 min	0.367651	0.077154	6	0.373207	0.0493728	4	0.330201	0.124241	5	0.313224	0.0763603	6	-1.04107	-0.32192	-1.59484	-0.284091	0.34	0.498	0.482	0.699																					BzOOH
25	Dicumylperoxide	DiCuOOH	50 uM, 15 min	0.386226	0.0718818	3	0.884159	0.0470106	3	0.323579	0.0905122	3	0.828734	0.0659559	3	1.35335	-1.06173	-0.561721	-0.279437	0.559	0.705	34.143	<0.001	0.498	7.056	Yes	0.0626	0.888	No	0.443	6.271	Yes												DiCuOOH
24N	NAC+Benzoylperoxide	NAC+BzOOH	1 mM, 15 min + 200 uM, 15 min	0.476191	0.0348974	4	0.701949	0.0638545	4	0.717227	0.0555035	4	0.439194	0.0613186	4	1.15075	0.147527	-2.76633	0.369298	0.162	0.86	21.178	<0.001	0.226	5.02	Yes	0.241	5.359	Yes	0.037	0.823	No												NAC+BzOOH

## Sheet: Cytotoxicity
Cytotoxicity evaluation
			Exposure time
Chemical	Abbreviation	Con-centra-tion	1 h	24 h
epidermal growth factor	EGF	20 ug/L	0.862394	0.948318
thrombin receptor activator peptide-6	TRAP-6	50 uM	0.92301	0.955764
DAG-kinase inhibitor 1	R59022	50 uM	0.910844	0.726985
arachidonic acid	AA	100 uM	1.02582	0.00872327
lauricidin	Lau	150 uM	0.790093	0.875552
12-O-tetradecanoylphorbol 13-acetate	TPA	10 nM	0.804522	0.586344
B-glycyrrhetinic acid	BGA	50 uM	0.65851	0.524115
perfluorooctanoic acid	PFOA	100 uM	1.08549	0.956792
perfluorodecanoic acid	PFDA	80 uM	0.856766	0.403521
heptadecafluorooctanesulfonic acid	PFOSA	40 uM	0.785419	0.877586
fluorene	Flu	100 uM	0.972521	1.02246
1-methylfluorene	1-MeFlu	70 uM	0.889871	1.05783
phenanthrene	Phe	70 uM	0.876533	1.00581
1-methylanthracene	1-MeA	70 uM	0.854532	0.859868
9,10-dimethylanthracene	9,10-diMeA	100 uM	0.967881	0.983618
fluoranthene	Fla	70 uM	0.915223	0.927497
pyrene	Pyr	70 uM	0.903705	0.981031
1-methylpyrene	1-MePyr	70 uM	0.936325	0.937559
pentachlorophenol	PCP	50 uM	0.797989	0.426807
lindane	Lindane	60 uM	0.981872	0.982334
DDT	DDT	30 uM	0.844934	1.16975
PCB 153	PCB 153	50 uM	0.824408	0.818477
alachlor	Ala	185 uM	0.839566	0.0683236
benzoylperoxide	BzOOH	200 uM	0.0784547	0.0506401
dicumylperoxide	DiCuOOH	50 uM	0.845882	1.05892
